# Supplementary figures and images for: Clinical measurement of lupus nephritis activity is inferior to biomarker-based activity assessment using the renal activity index for lupus nephritis in childhood-onset systemic lupus erythematosus
Source: PubMed Central journal article supplement — Lupus Sci Med. 2022 May 12;9(1):e000631. doi: 10.1136/lupus-2021-000631 (PMC9109101; doi:10.1136/lupus-2021-000631), 2022-05-12

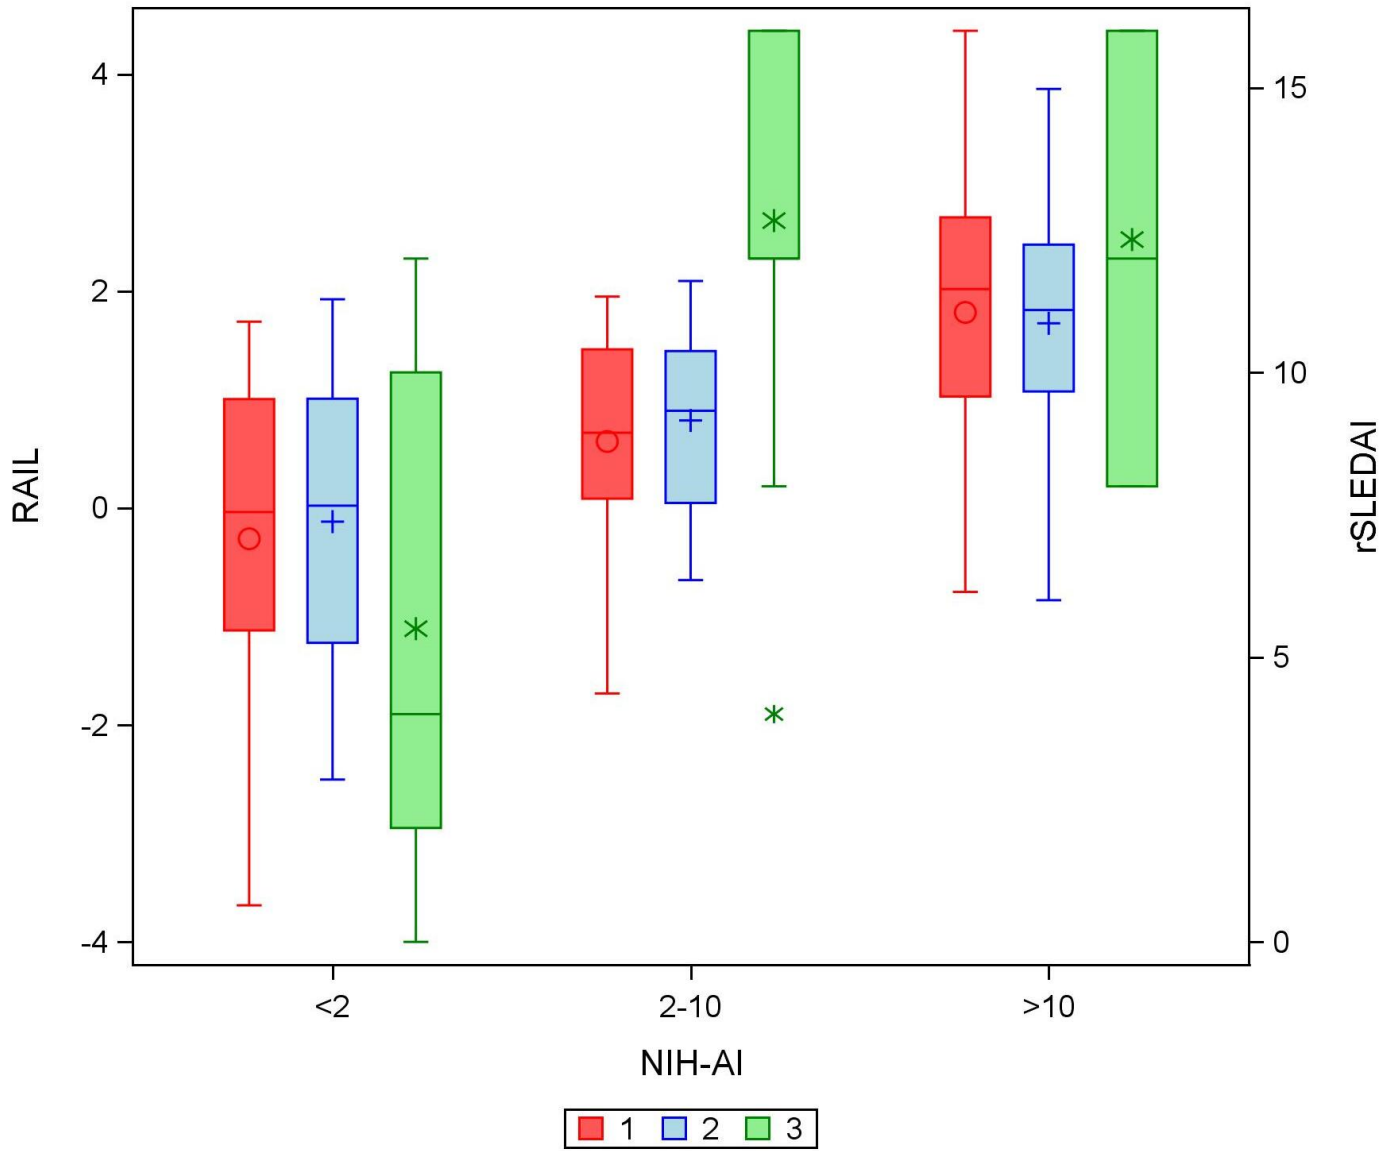

Supplement: lupus-2021-000631supp001.pdf [file lupus-2021-000631supp001.pdf]

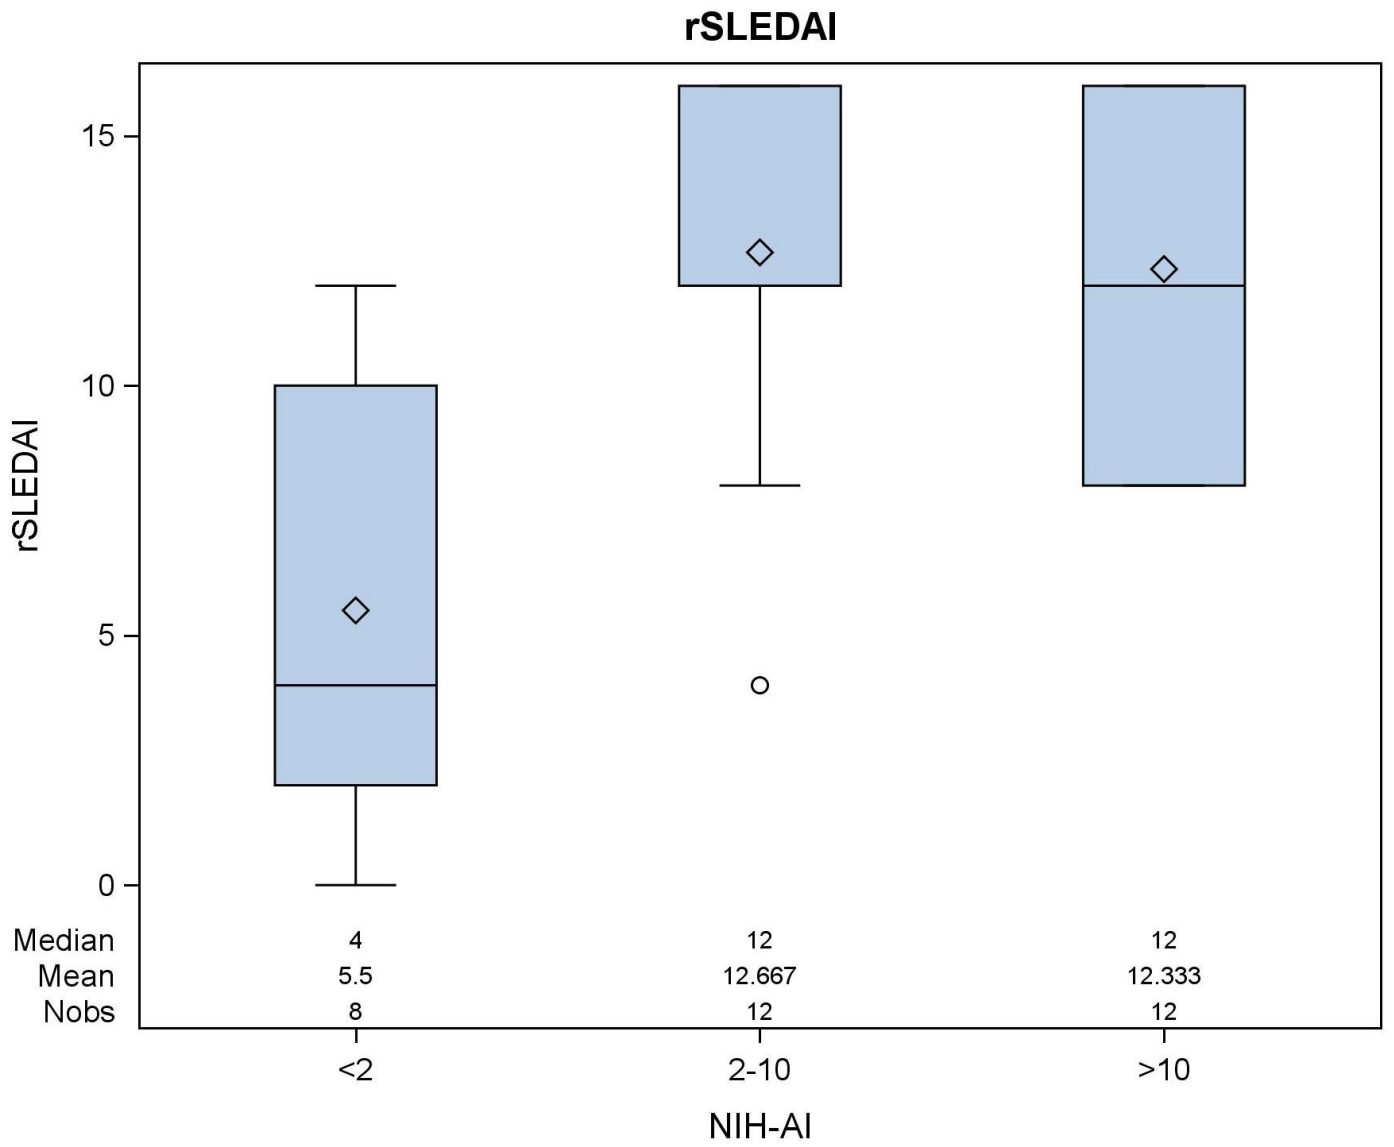

Supplement: lupus-2021-000631supp002.pdf [file lupus-2021-000631supp002.pdf]
